# Supplementary material
Source: Springer Nature journal article supplement (https://www.springermedizin.de/resource/supplementary/12889_2011_4104_MOESM1_ESM.pdf/9491570)

**Figure 1: Likelihood of being a victim of physical intimate partner violence and level of problem drinking by the spouse/partner**

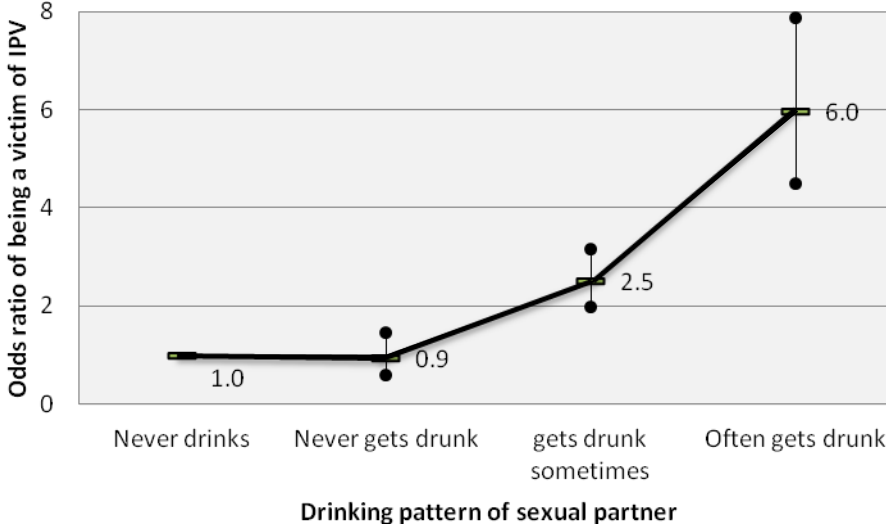

Supplement: MOESM1 [file 9491570]
